# Supplementary material
Source: Springer Nature journal article supplement (https://www.springerprofessional.de/resource/supplementary/13638_2011_375_MOESM14_ESM.pdf/11897648)

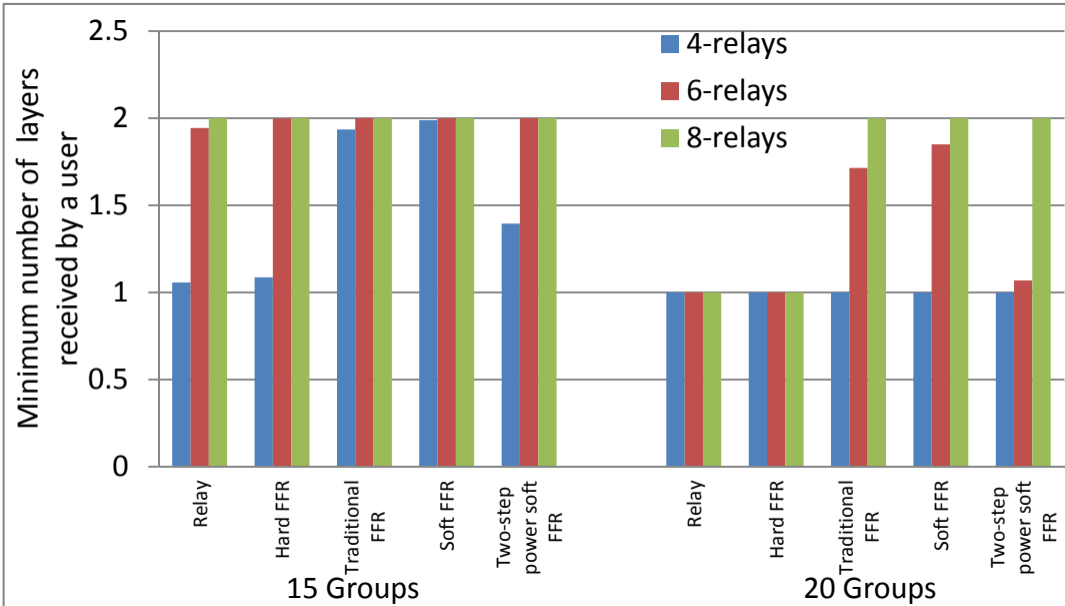

Supplement: MOESM14 [file 11897648]
